# Supplementary material for: Clones of cells switch from reduction to enhancement of size variability in Arabidopsis sepals
Source: PubMed Central journal article supplement (PMC5769632; doi:10.1242/dev.153999), 2017-12-01
Supplement: DEV153999supp.pdf [file DEV153999supp.pdf]

Fig. S1A

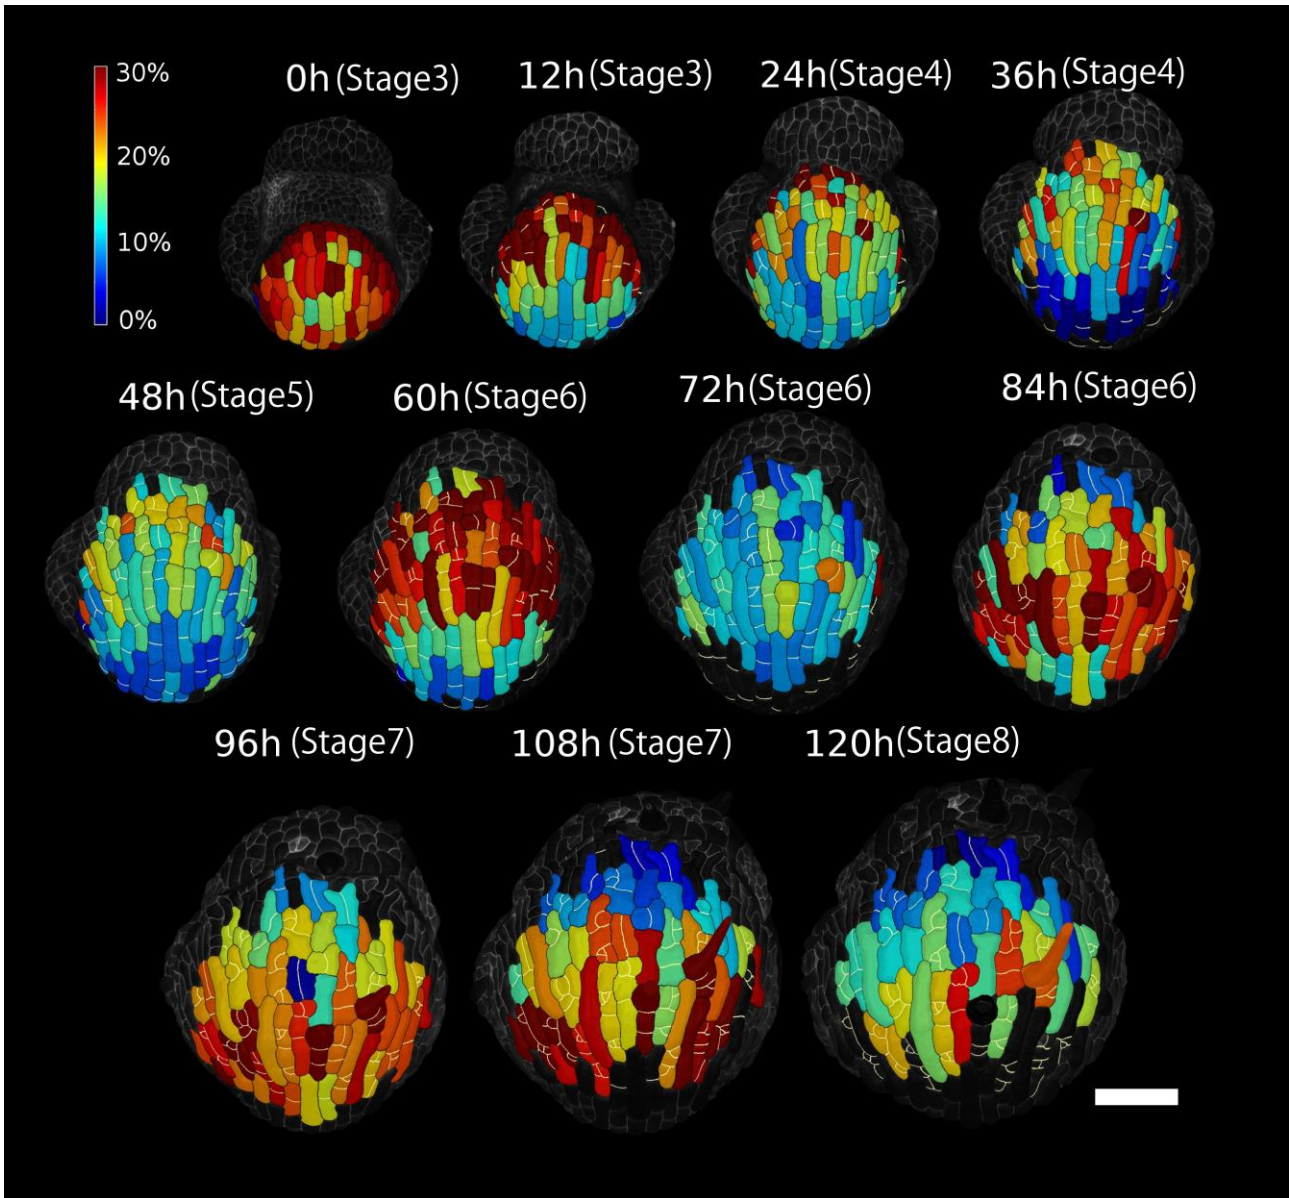

Fig. S1B

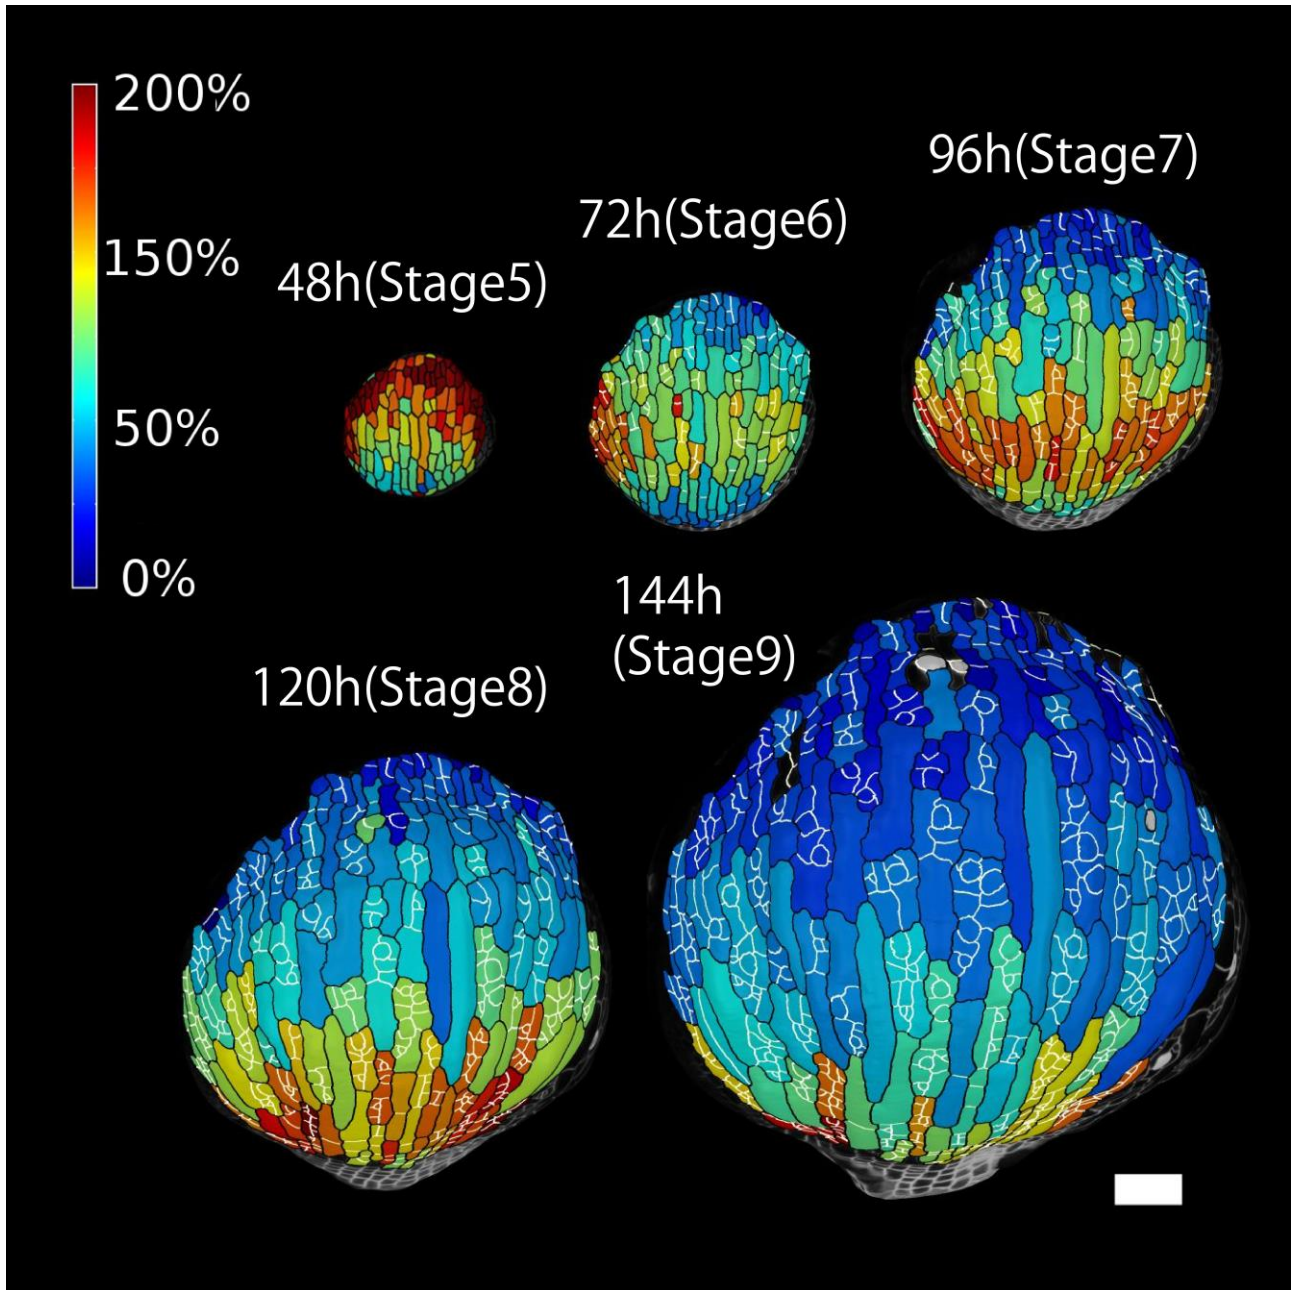

Fig. S1C

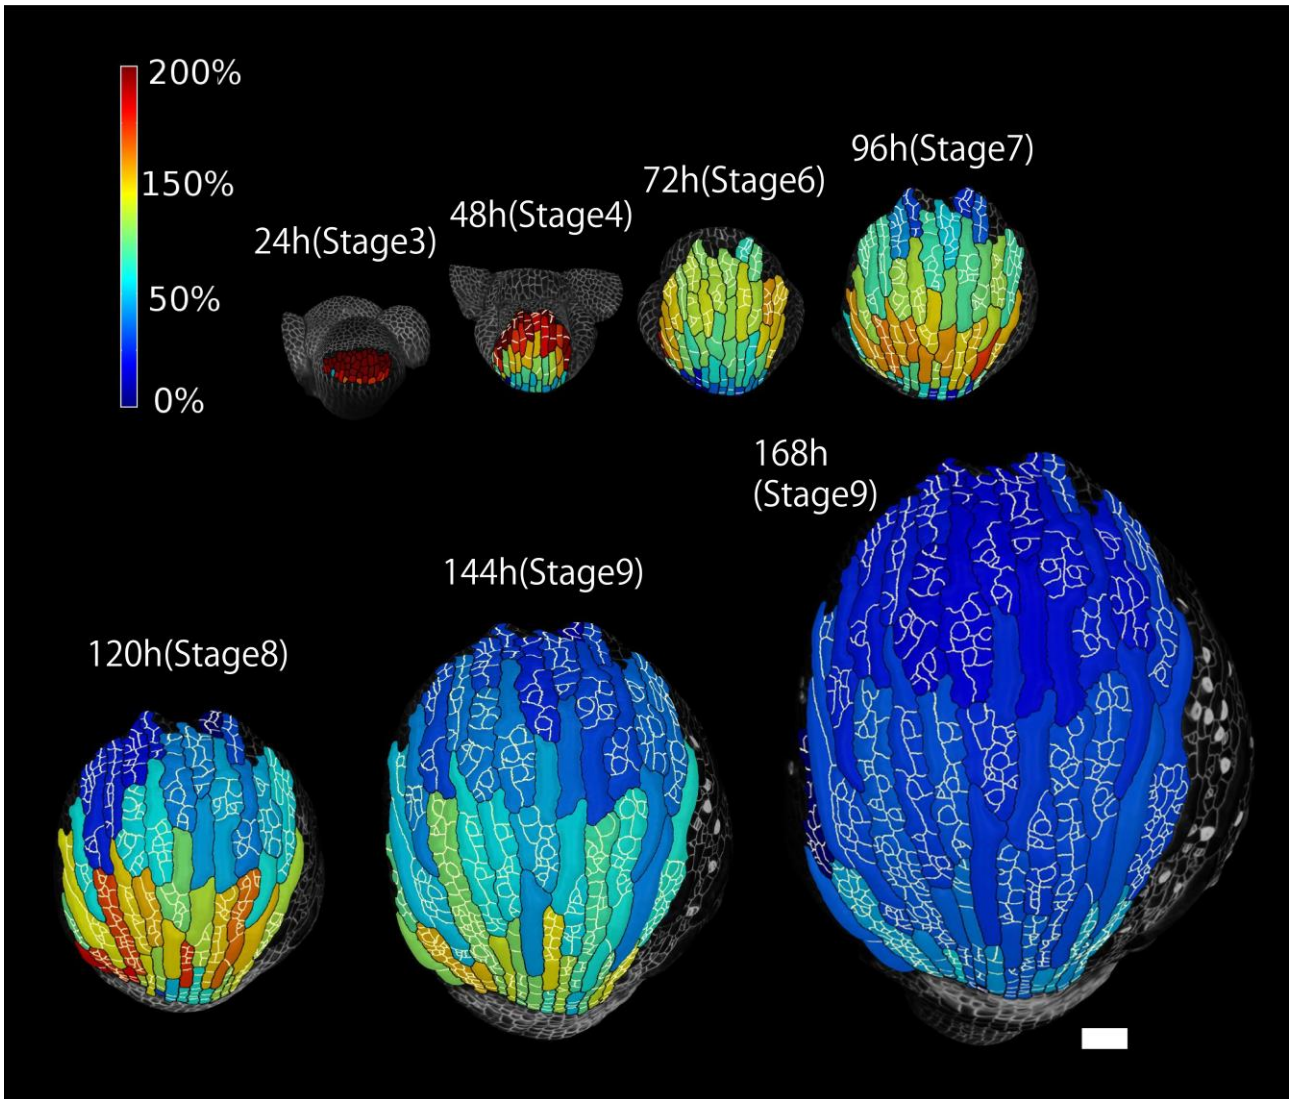

Fig. S1D

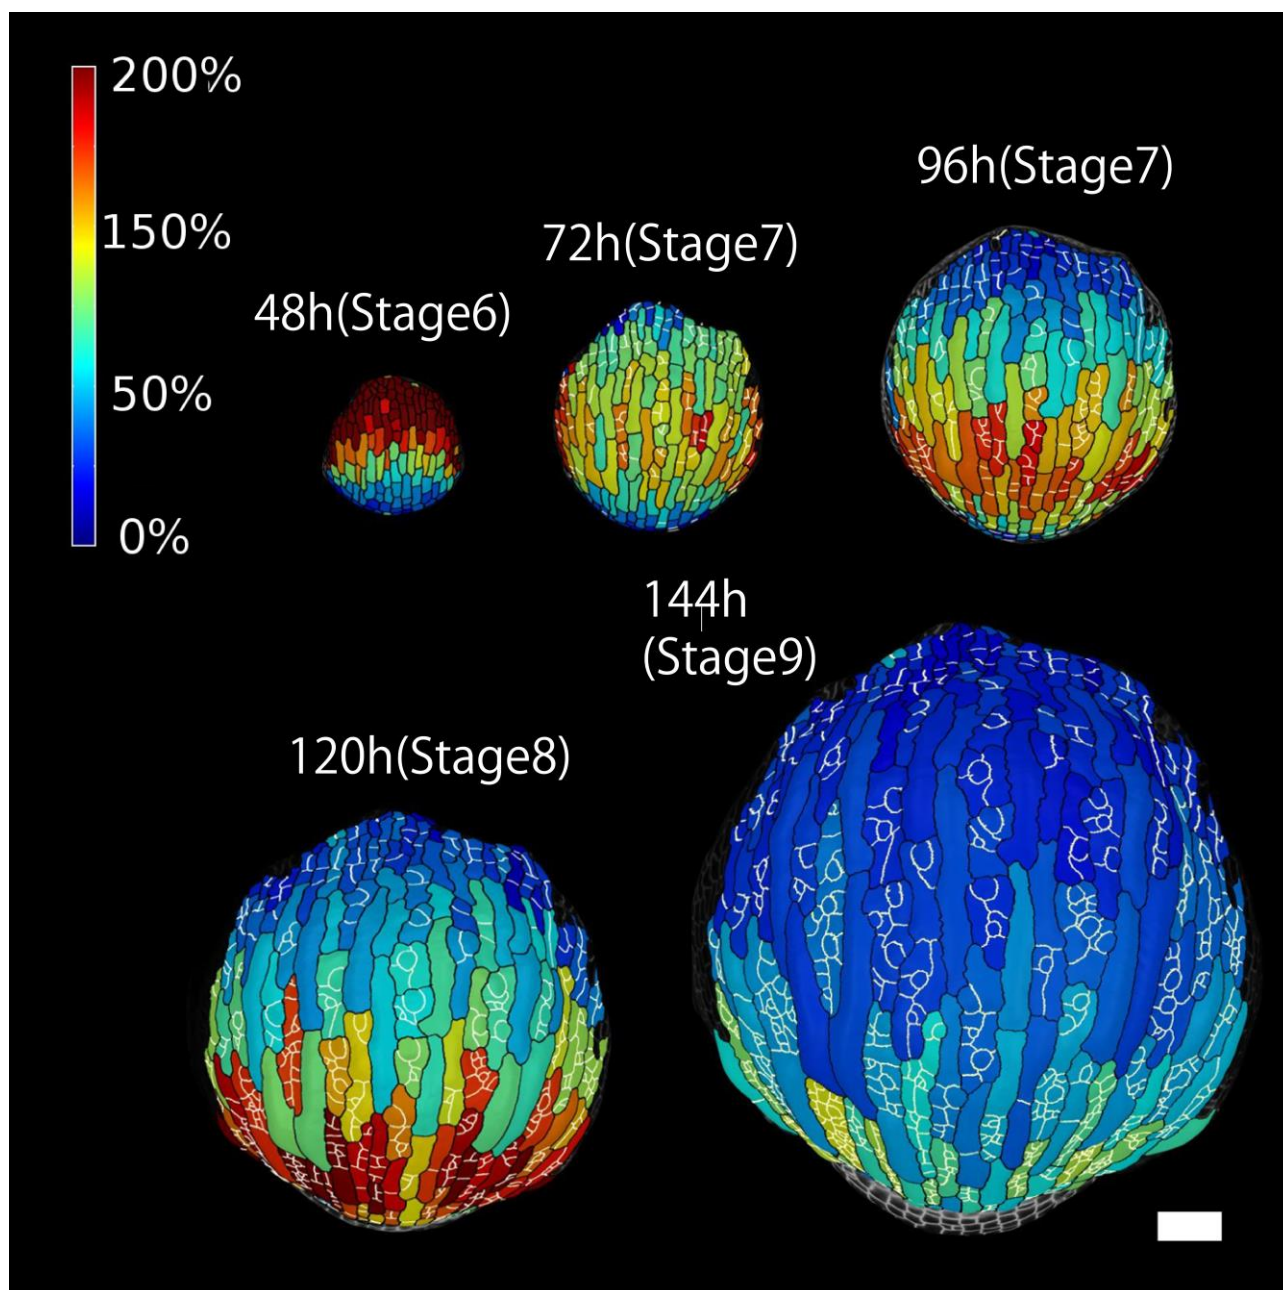

Fig. S1A-D. Heat map of areal growth of clones  $(A_{t+\Delta t} - A_t)/A_t \times 100$  (%) over consecutive 12h intervals for flower wt-a2 (S1A), and consecutive 24h intervals for flower wt-b1, wt-b2 and wt-b3 (S1B-S1D). Scale bars are  $50\mu\text{m}$ . The clones and the new cell walls built after 0h are outlined in black and white, respectively.

Fig. S2.

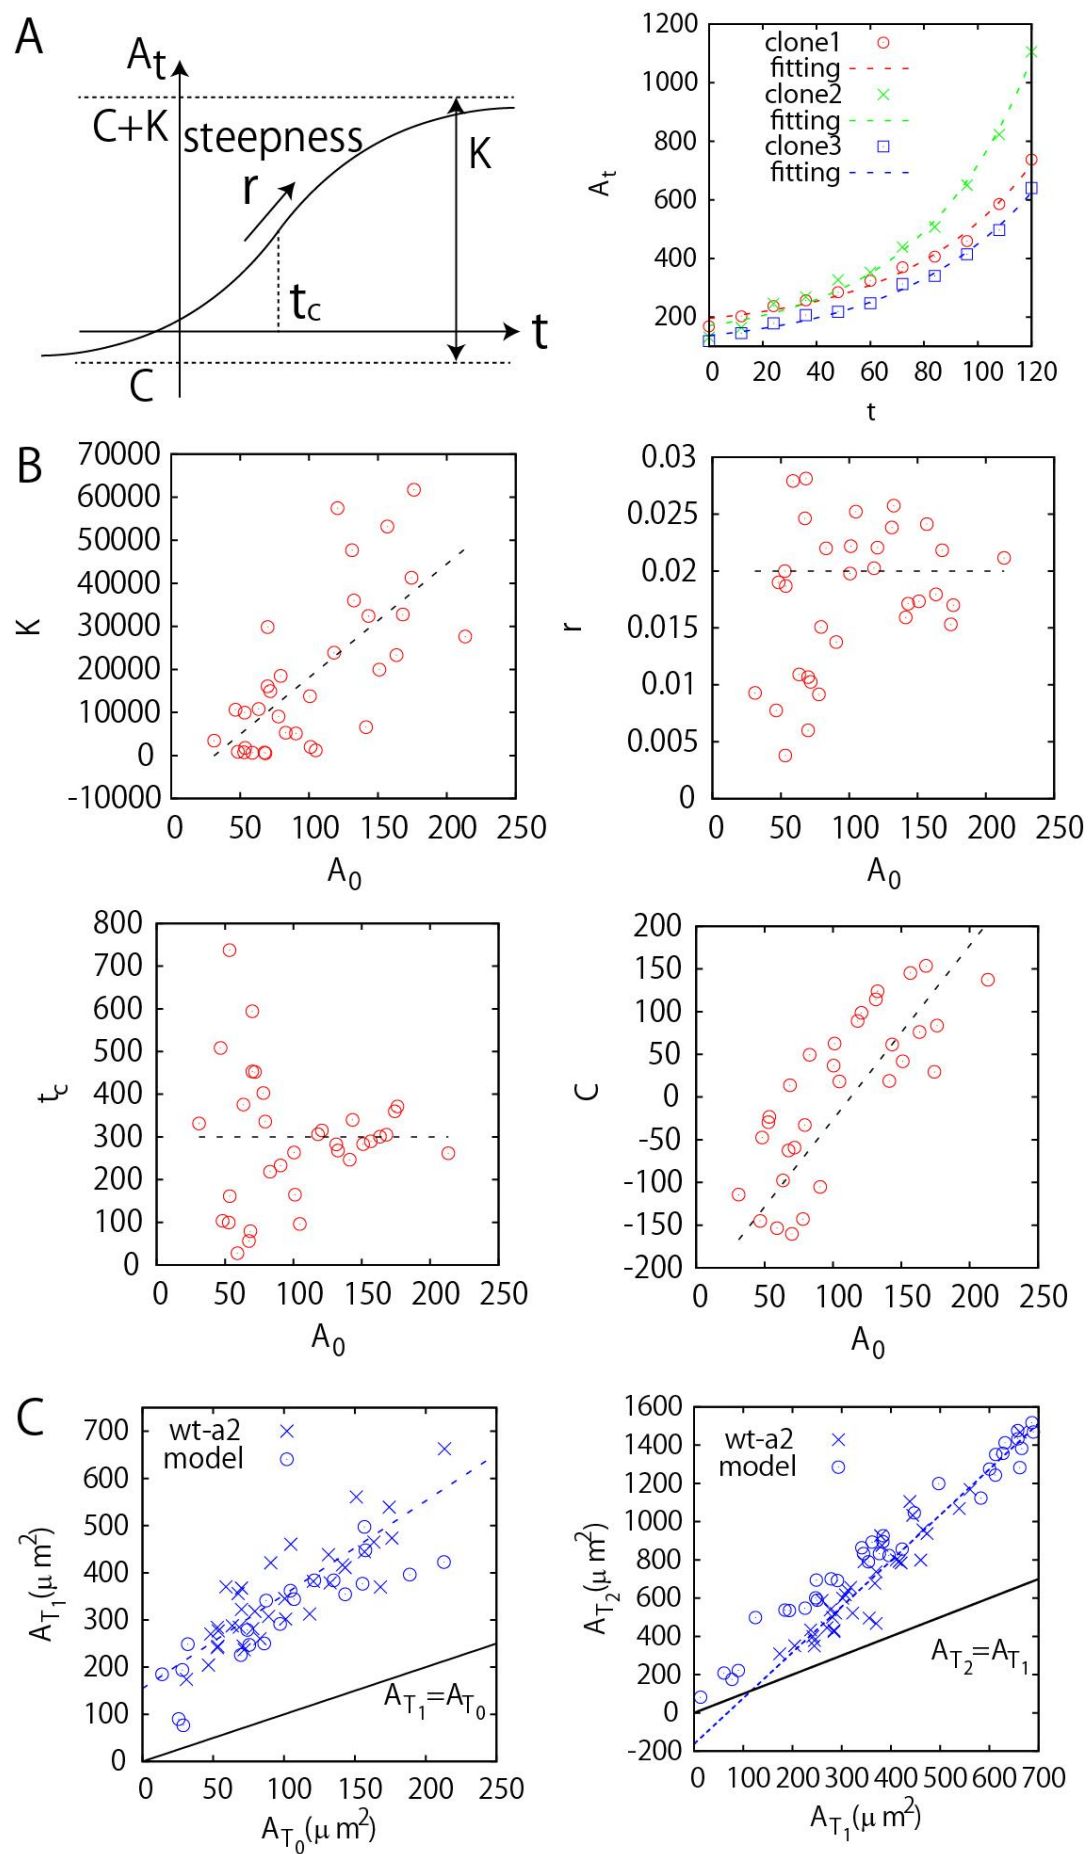

Fig. S2. (A) (Left panel) Schematic of the sigmoidal functional form  $f(t) = \frac{K}{1 + \exp r(t_c - t)} + C$  where  $r$  is the steepness of the curve around the half time  $t = t_c$ ,  $K$  is the total growth amount and  $C$  is the clone area in the very beginning. (Right panel) Fitting results of the growth curve of the area  $A_t$ . (B) Four fitting parameters with the phenomenological model (dotted line). (C) Comparison between the model and the data from Fig. 2D and 2E.

Fig. S3.

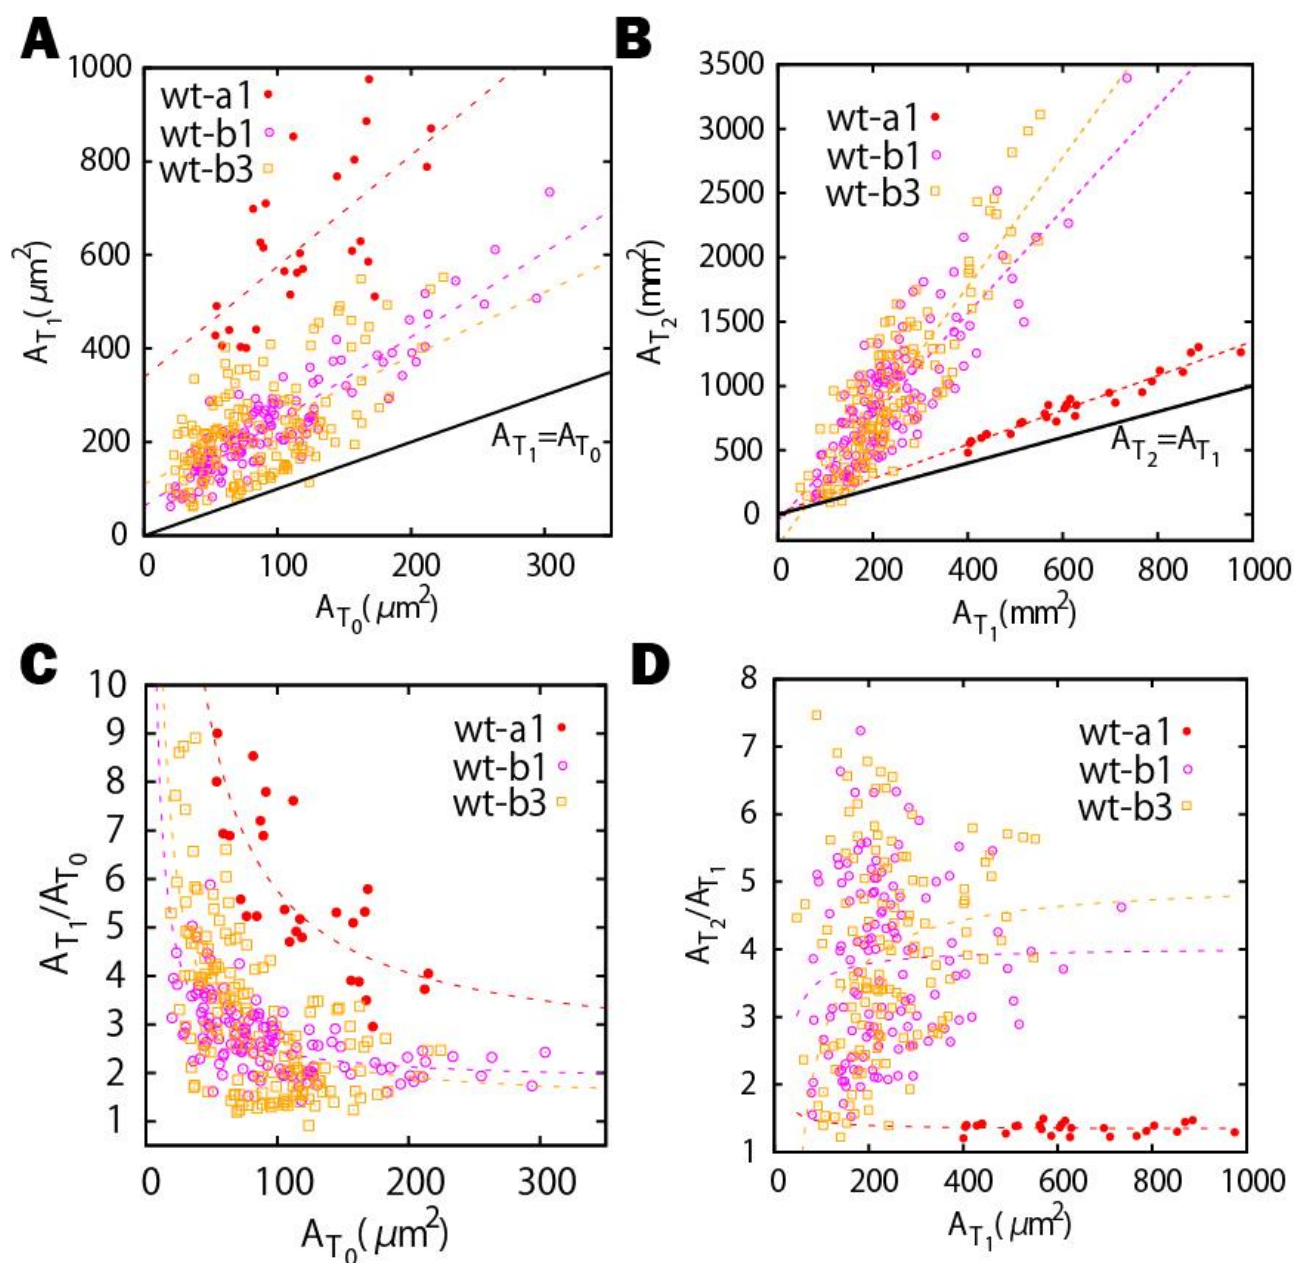

Fig. S3. (A-B)  $A_{T_E}$  versus  $A_{T_L}$  plot for the clones at  $T_0$  versus those at  $T_1$  (A), and at  $T_1$  versus those at  $T_2$  (B). (C-D)  $A_{T_E}$  versus  $A_{T_L}/A_{T_E}$  plot for the clones at  $T_0$  versus those at  $T_1$  (C), and at  $T_1$  versus those at  $T_2$  (D). Error bars represent the 50%-confidence interval (see Materials and Methods).

Fig. S4.

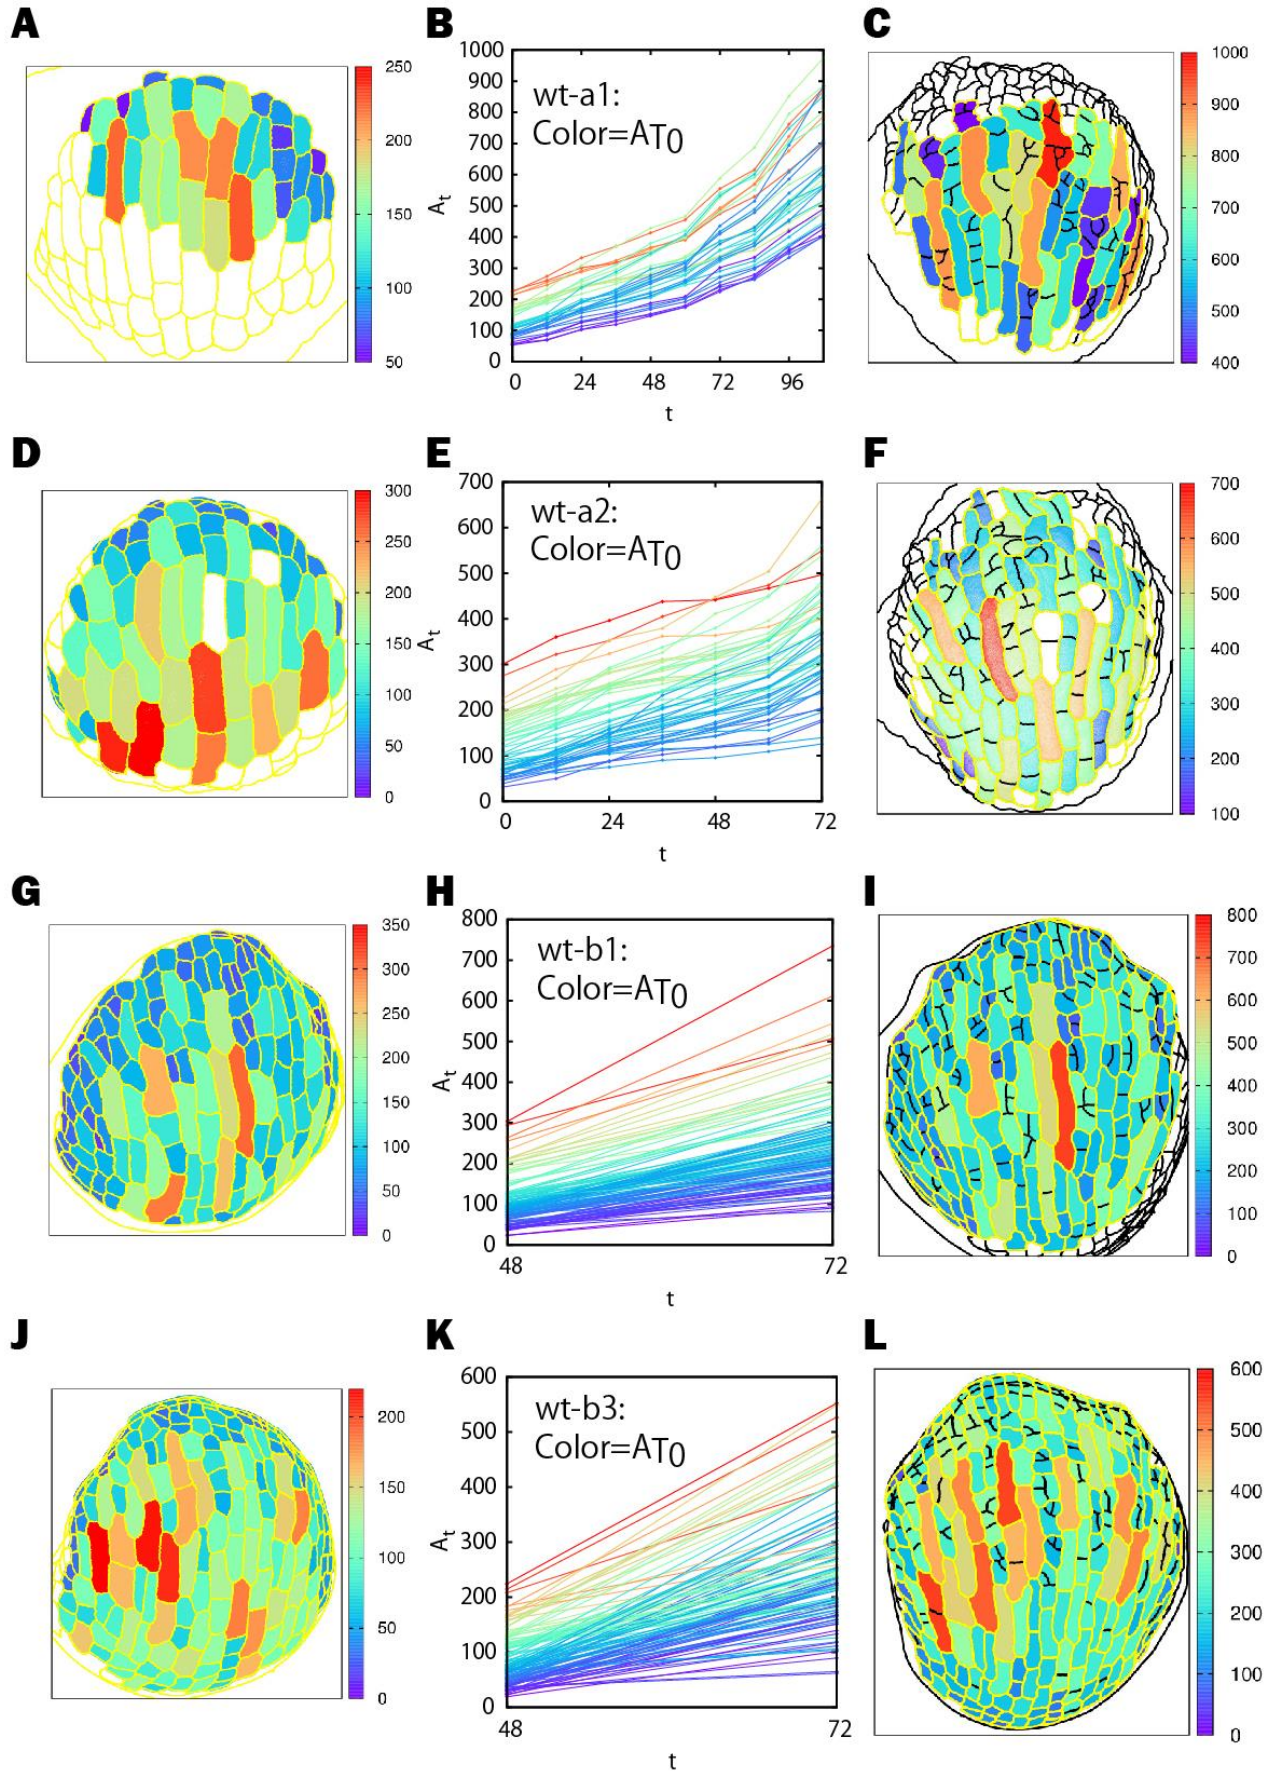

Fig. S4. (A,D,G,J) Heat map of the initial clone area  $A_{T_0}$  ( $\mu\text{m}^2$ ). (B,E,H,K) Growth curves of clones colored according to their initial size  $A_{T_0}$ . (C,F,I,L) Heat map of the size of the clones  $A_{T_1}$  ( $\mu\text{m}^2$ ).



Fig. S5.

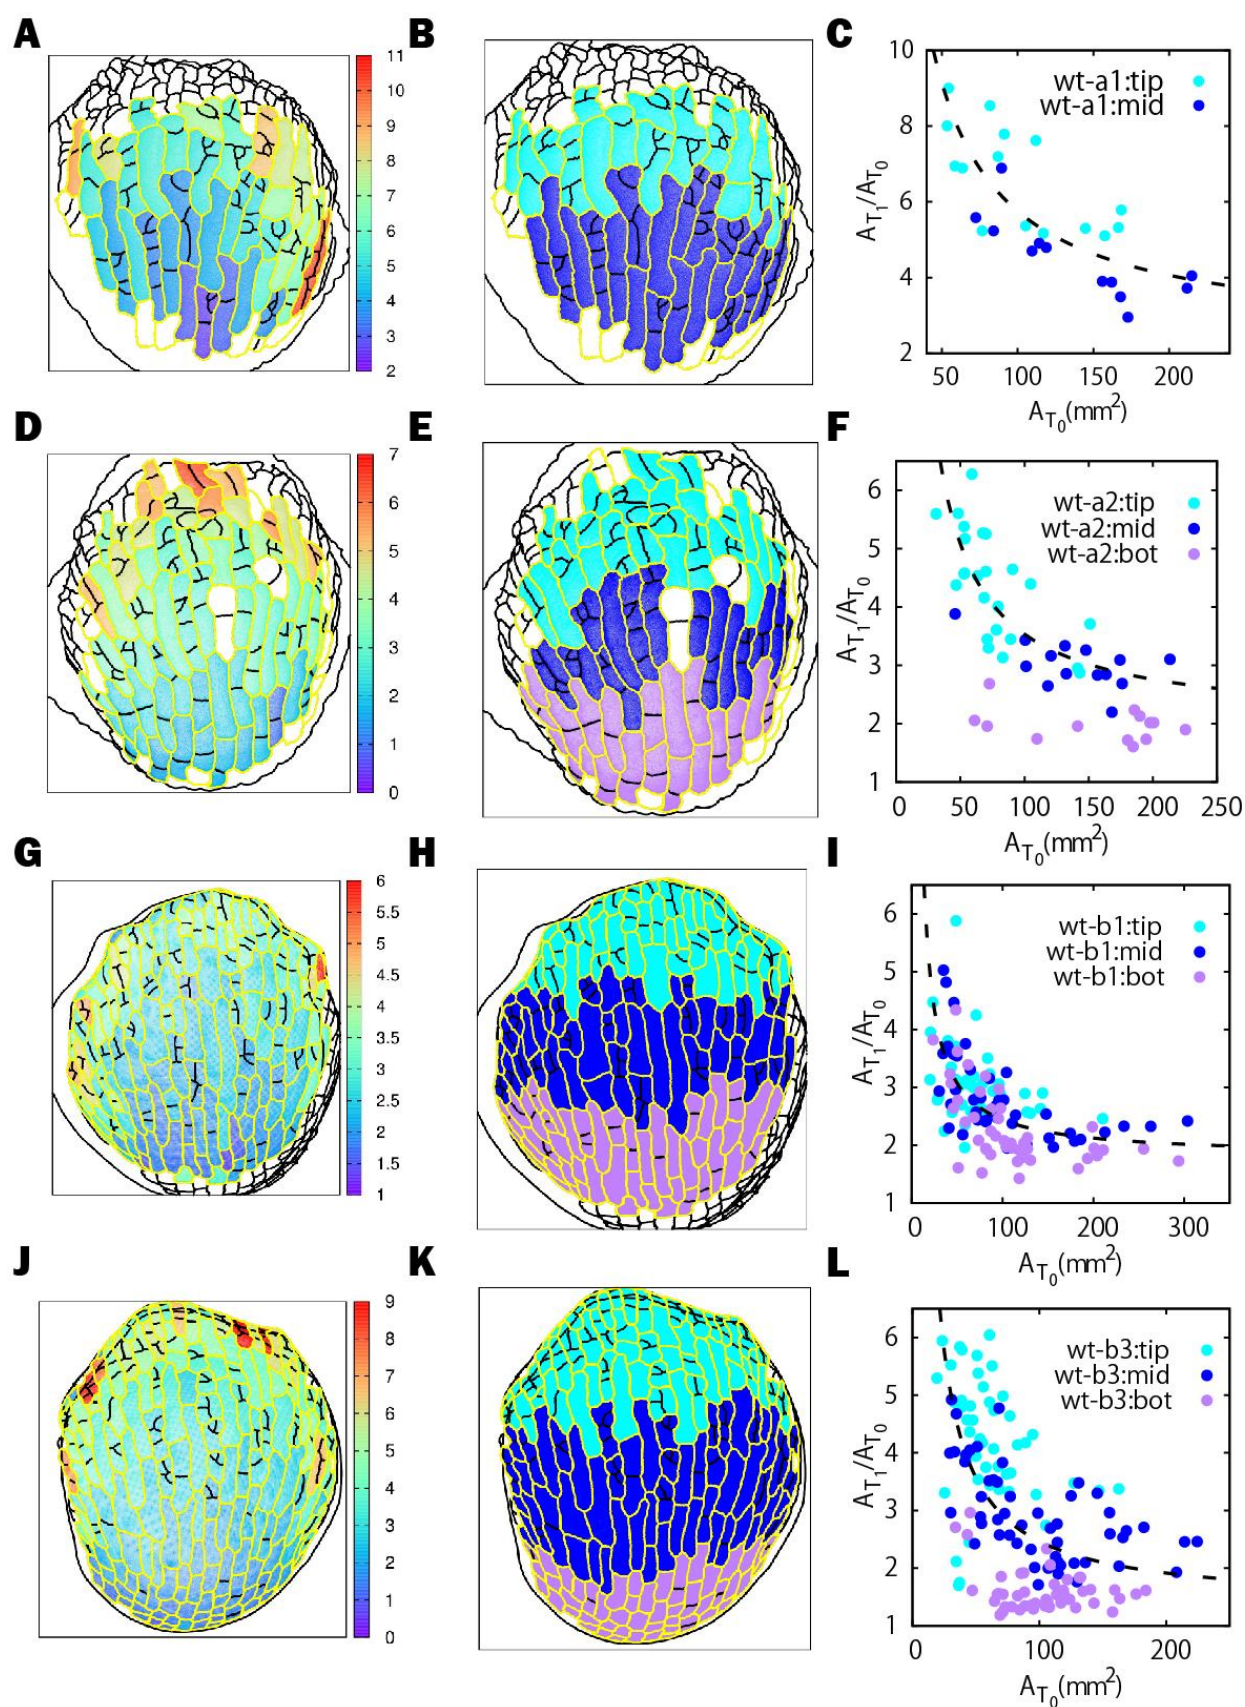

Fig. S5. (A,D,G,J) Heat map of the cumulative growth ratio  $A_{T_1}/A_{T_0}$  showing a continuous spatial trend from tip to bottom. (B,E,H,K) Classification of tip (cyan), middle (blue) and bottom (purple) regions. (C,F,I,L) Plot of cumulative growth ratios  $A_{T_1}/A_{T_0}$  versus initial area  $A_{T_0}$  for clones in each region.

Fig. S6.

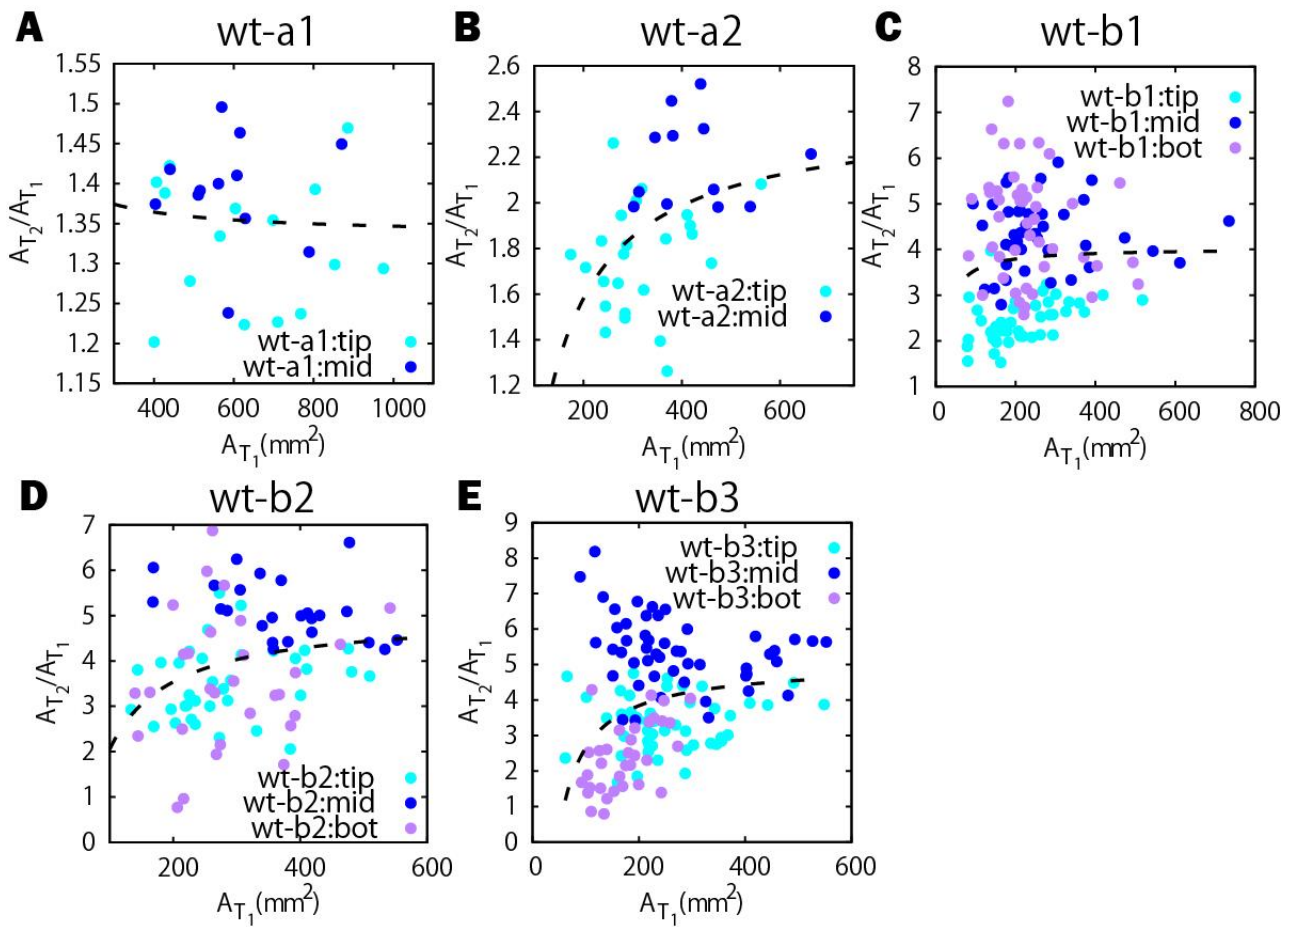

Fig. S6. (A-E) Plot of cumulative growth ratios  $A_{T_2}/A_{T_1}$  versus initial area  $A_{T_1}$  for clones in each region for wt-a1, wt-a2, wt-b1, wt-b2 and wt-b3.

Fig. S7.

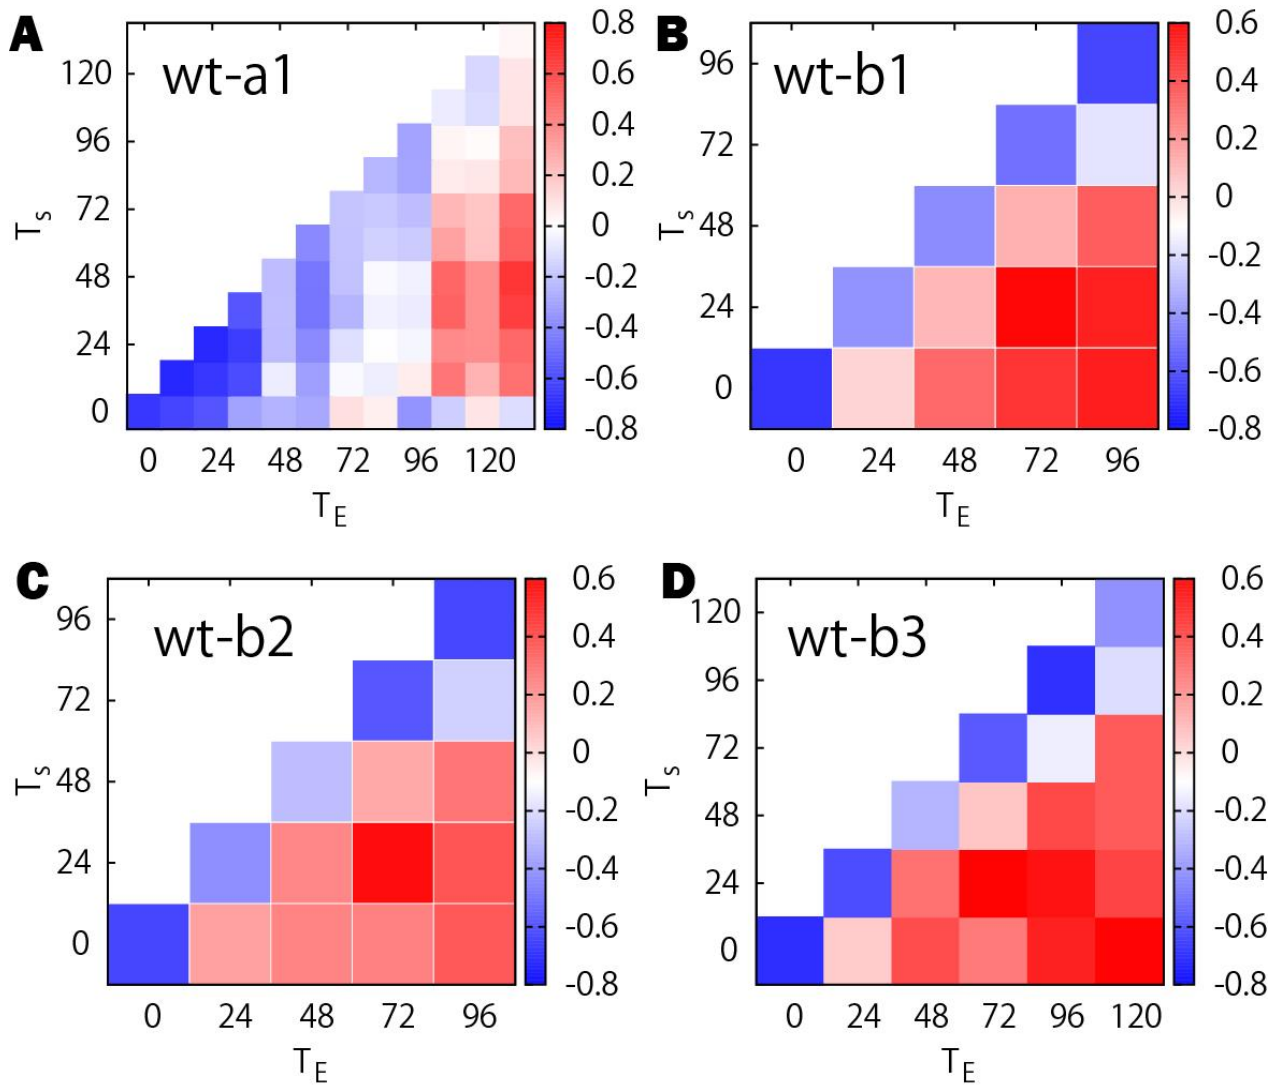

Fig. S7. (A-D) Spearman correlation coefficient between size and growth ratio of the clone for different choice of  $T_s$  and  $T_E$  for the sepal wt-a1, wt-b1, wt-b2 and wt-b3, respectively.

Fig. S8.

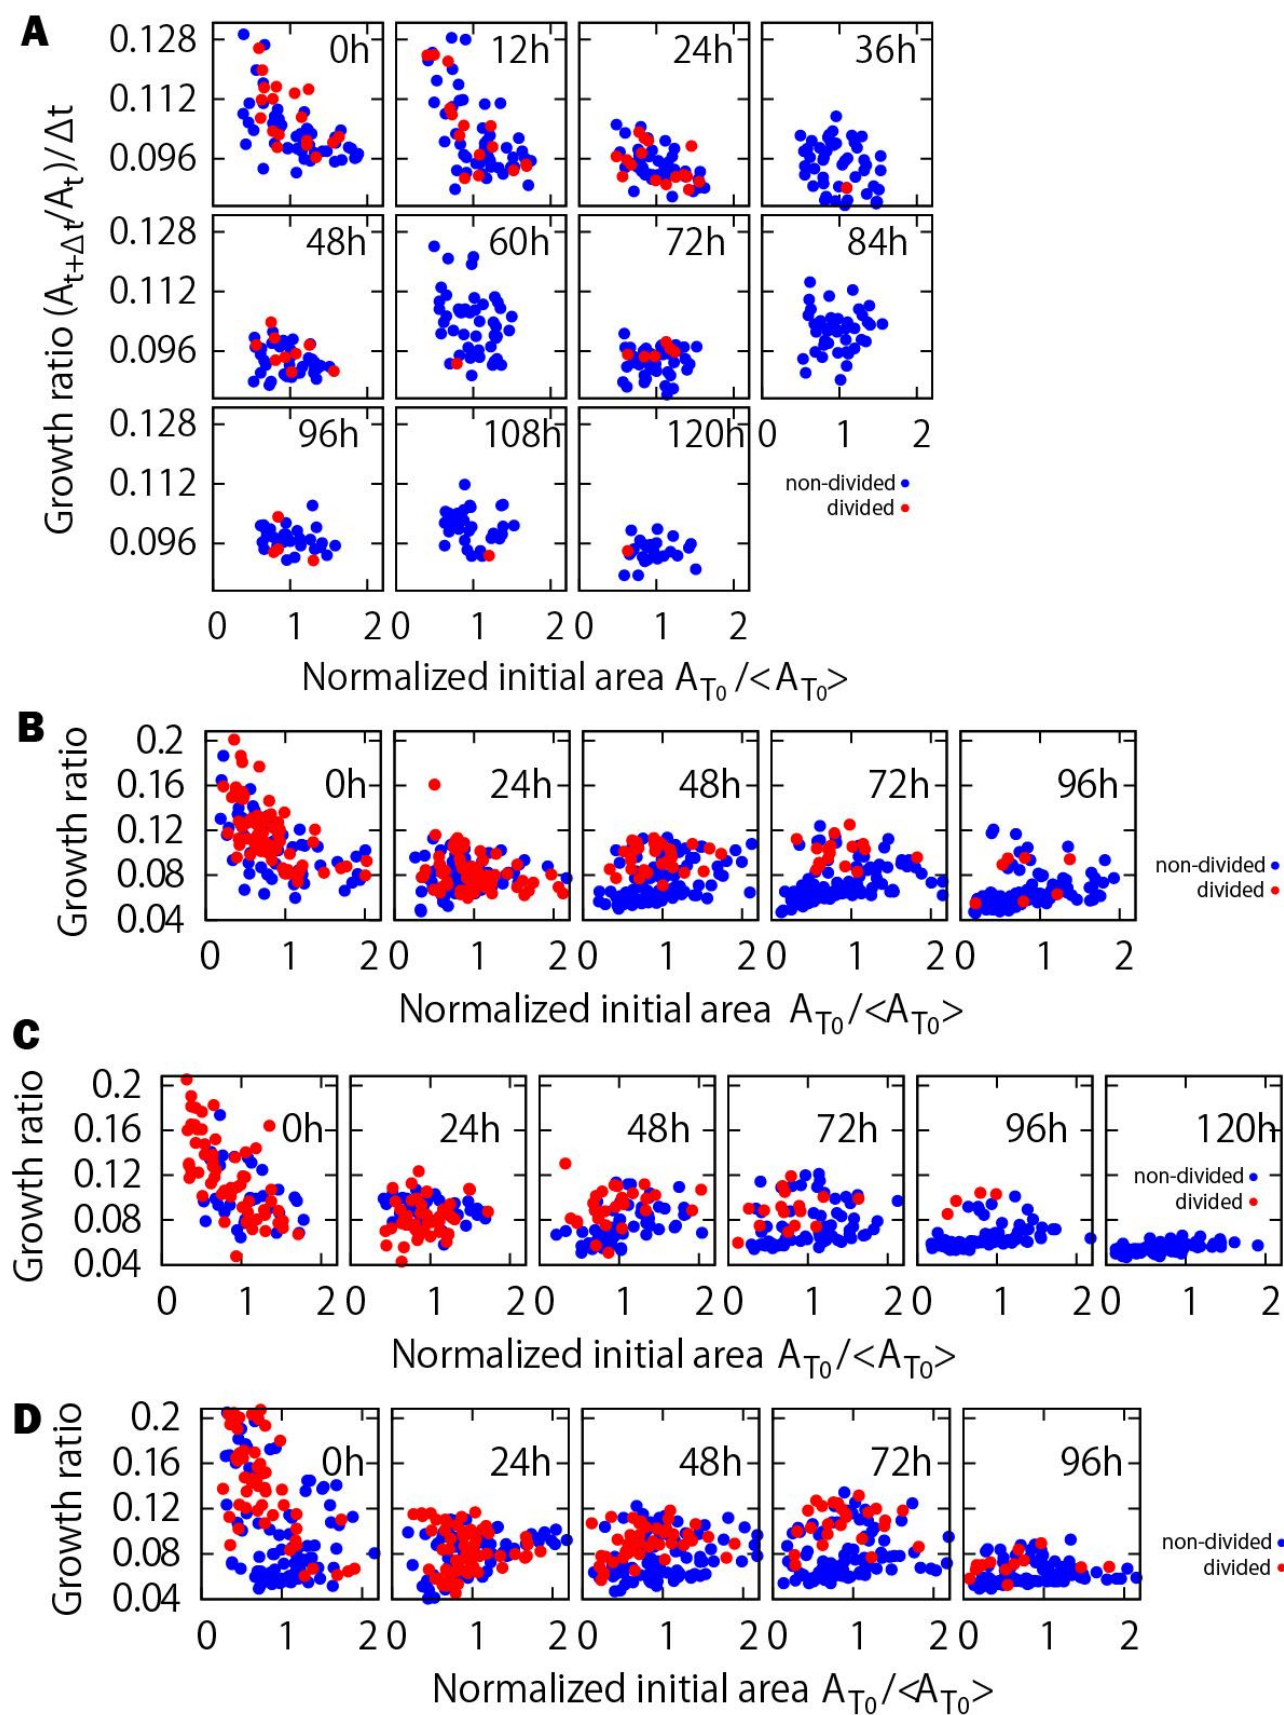

Fig. S8. (A-D) Plot of growth ratio of the clone at each time step  $(A_{t+\Delta t}/A_t)/\Delta t$  versus normalized initial clone area  $A_{T_0}/\langle A_{T_0} \rangle$  for the sepal wt-a1, wt-b1, wt-b2 and wt-b3, respectively.

Fig. S9.

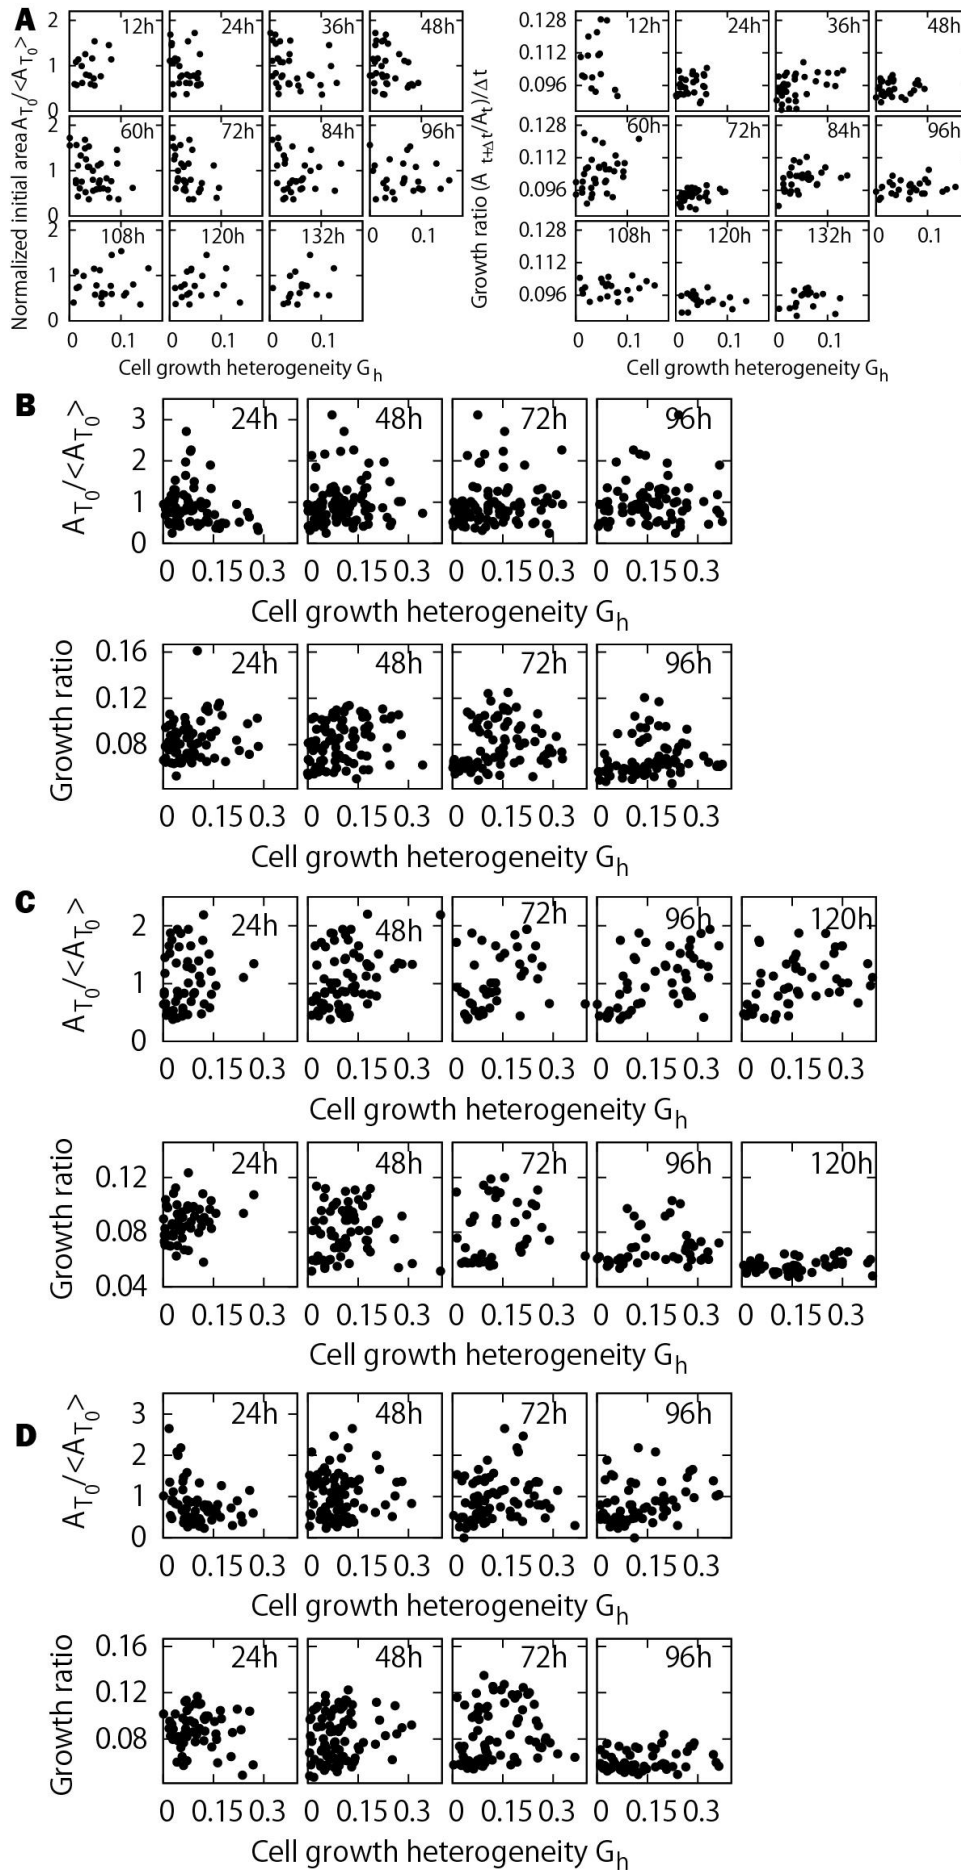

Fig. S9. (A-D) Cell growth heterogeneity versus normalized initial clone area and cell growth heterogeneity versus growth ratio of the clone at each time step for the sepal wt-a1, wt-b1, wt-b2 and wt-b3, respectively.
